# Supplementary material for: Methotrexate Maintenance After Initiation of Biological or Targeted Synthetic DMARDs in Rheumatoid Arthritis: Results from the 2-Year Longitudinal Prospective Non-interventional STRATEGE2 Study
Source: Springer Nature journal article supplement (doi:10.1007/s40744-025-00806-1), 2025-12-03
Supplement: MOESM1 [file 40744_2025_806_MOESM1_ESM.pdf]

## **SUPPLEMENTARY MATERIAL**

### **Title**

Methotrexate Maintenance after Initiation of Biological or Targeted Synthetic DMARDs in Rheumatoid Arthritis: Results from the 2-year Longitudinal Prospective Non-Interventional STRATEGE2 Study

### **Author Details**

Cécile GAUJOUX-VIALA<sup>1</sup>, Emmanuelle DERNIS<sup>2</sup>, Eric SENBEL<sup>3</sup>, Hélène HERMAN-DEMARS<sup>4</sup>, Jennifer BECKER<sup>4</sup>, and René-Marc FLIPO<sup>5</sup>

1 - UM1318, Desbrest Institute of Epidemiology and Public Health, University of Montpellier, INSERM, Rheumatology, Nîmes University Hospital, Montpellier, France

2 - University of Caen, CHU, Department of Rheumatology, Caen, France

3 - Rheumatology Specialty Center, 24 Place Castellane, Marseille, France

4 - Nordic Pharma, Medical Affairs Department, Paris, France

5 - Lille University Hospital, CHU Roger Salengro, Rheumatology Department, Lille, France

### **Correspondence Details**

Prof. Cécile GAUJOUX-VIALA

cecile.gaujoux.viala@chu-nimes.fr

Service de Rhumatologie, CHU de Nîmes,

Place du Pr. Robert Debré,

30029 Nîmes Cedex 9, France

**Supplementary Table S1. Reasons driving the decision to discontinue MTX treatment**

| <b>Reasons for MTX Discontinuation</b>                | <b>Inclusion visit</b> | <b>M12 visit</b> | <b>M24 visit</b> |
|-------------------------------------------------------|------------------------|------------------|------------------|
| Adverse event, <i>n</i> (%)                           |                        | 10 (35.7)        | 14 (35.9)        |
| Participant decision, <i>n</i> (%)                    | 3 (75.0)               | 11 (39.3)        | 13 (33.3)        |
| Attempting to conceive, <i>n</i> (%)                  | 1 (25.0)               | 2 (7.1)          | 4 (10.3)         |
| Remission, <i>n</i> (%)                               |                        |                  | 2 (5.1)          |
| Adverse event AND participant decision, <i>n</i> (%)  |                        | 2 (7.1)          | 2 (5.1)          |
| Participant decision AND another reason, <i>n</i> (%) |                        |                  | 1 (2.6)          |
| Another reason, <i>n</i> (%)                          |                        | 3 (10.7)         | 3 (7.7)          |

Abbreviations: *M12*, study visit 12 months after b/tsDMARD initiation; *M24*, study visit 24 months after b/tsDMARD initiation; *MTX*, methotrexate.

**Supplementary Table S2. Adverse events leading to MTX discontinuation**

| List of AE                           | MTX dose and route of administration | AE Severity | Severity criteria                     | Resolution of AE               | AE resolved after MTX discontinuation |
|--------------------------------------|--------------------------------------|-------------|---------------------------------------|--------------------------------|---------------------------------------|
| Liver disturbance (transaminases x5) | 17.5 mg/week<br>Subcutaneous         | Moderate    | Non-severe                            | Full recovery without sequelae | Yes                                   |
| Nausea                               | 22.5 mg/week<br>Subcutaneous         | Mild        | Non-severe                            | Full recovery without sequelae | Yes                                   |
| Diarrhoea                            | 20 mg/week<br>Oral                   | Moderate    | Non-severe                            | Not resolved                   | No                                    |
| Alopecia                             | 20 mg/week<br>Subcutaneous           | Moderate    | Non-severe                            | Full recovery without sequelae | Yes                                   |
| Visual disturbances                  | 20 mg/week<br>Subcutaneous           | Moderate    | Non-severe                            | Full recovery without sequelae | Yes                                   |
| Dry morning cough                    | 20 mg/week<br>Subcutaneous           | Moderate    | Non-severe                            | Full recovery without sequelae | Yes                                   |
| Nausea                               | 20 mg/week<br>Oral                   | Moderate    | Non-severe                            | Full recovery without sequelae | Yes                                   |
| Impaired liver function              | 10 mg/week<br>Oral                   | Moderate    | Other medically significant condition | Not resolved                   | Unknown                               |
| Allergic reaction                    | 10 mg/week<br>Oral                   | Moderate    | Non-severe                            | Unknown                        | Unknown                               |
| Leukoneutropenia                     | 10 mg/week<br>Oral                   | Moderate    | Other medically significant condition | Full recovery without sequelae | Yes                                   |
| Neutropenia                          | 10 mg/week<br>Oral                   | Moderate    | Other medically significant condition | Ongoing recovery               | Unknown                               |

**Supplementary Table S3. Univariate logistic regression: reasons driving the decision to maintain MTX at M24**

| Logistic regression (univariate) - M24, N=157                  |                                   |                                                                       |            |                   |                    |
|----------------------------------------------------------------|-----------------------------------|-----------------------------------------------------------------------|------------|-------------------|--------------------|
| Factor                                                         | N                                 | Maintenance of MTX for the first two years after b/tsDMARD initiation | P type III | OR [95% CI]       | P versus Reference |
| <u>Factors related to the participant</u>                      |                                   |                                                                       |            |                   |                    |
| b/tsDMARD monotherapy or combination therapy                   | Missing (N=1)                     |                                                                       |            |                   |                    |
|                                                                | Monotherapy (N=80) (Reference)    | 33.8%                                                                 | 0.952      |                   |                    |
|                                                                | Combination therapy (N=76)        | 34.2%                                                                 |            | 1.02 [0.53; 1.98] | 0.952              |
| Alternative disability index (score HAQ-DI without adjustment) | Missing (N=22)                    |                                                                       |            |                   |                    |
|                                                                | Quantitative analysis (N=135)     |                                                                       | 0.285      | 1.36 [0.78; 2.37] |                    |
| Corticosteroids at inclusion                                   | Missing (N=1)                     |                                                                       |            |                   |                    |
|                                                                | No (N=76)                         | 35.5%                                                                 | 0.816      | 1.08 [0.56; 2.09] | 0.816              |
|                                                                | Yes (N=80) (Reference)            | 33.8%                                                                 |            |                   |                    |
| CQR19 Total score < 80% / ≥ 80%                                | Missing (N=21)                    |                                                                       |            |                   |                    |
|                                                                | < 80 percent (N=84) (Reference)   | 31.0%                                                                 | 0.982      |                   |                    |
|                                                                | ≥ 80 percent (N=52)               | 30.8%                                                                 |            | 0.99 [0.47; 2.10] | 0.982              |
| Age [years]                                                    | Quantitative analysis (N=157)     |                                                                       | 0.020      | 1.03 [1.00; 1.06] |                    |
| MTX injection done by (at inclusion):                          | Missing (N=2)                     |                                                                       |            |                   |                    |
|                                                                | Patient (N=126)                   | 33.3%                                                                 | 0.638      | 0.82 [0.35; 1.89] | 0.638              |
|                                                                | Someone else (N=29) (Reference)   | 37.9%                                                                 |            |                   |                    |
| Body mass index ≥ 30 kg/m <sup>2</sup>                         | Missing (N=5)                     |                                                                       |            |                   |                    |
|                                                                | Yes (N=24)                        | 29.2%                                                                 | 0.480      | 0.71 [0.27; 1.84] | 0.480              |
|                                                                | No (N=128) (Reference)            | 36.7%                                                                 |            |                   |                    |
| Professional status                                            | Working (N=77) (Reference)        | 31.2%                                                                 | 0.404      |                   |                    |
|                                                                | Other (N=80)                      | 37.5%                                                                 |            | 1.32 [0.68; 2.57] | 0.404              |
| Nicotine consumption                                           | Current smoker (N=31) (Reference) | 22.6%                                                                 | 0.127      |                   |                    |
|                                                                | Former smoker / No-smoker (N=126) | 37.3%                                                                 |            | 2.04 [0.82; 5.10] | 0.127              |
| At least one medical history or comorbidities                  | Yes (N=82)                        | 37.8%                                                                 | 0.348      | 1.37 [0.71; 2.67] | 0.348              |
|                                                                | No (N=75) (Reference)             | 30.7%                                                                 |            |                   |                    |
| Rheumatoid factor                                              | Missing (N=9)                     |                                                                       |            |                   |                    |
|                                                                | Positive (N=112)                  | 33.0%                                                                 | 0.734      | 0.87 [0.40; 1.92] | 0.734              |
|                                                                | Negative (N=36) (Reference)       | 36.1%                                                                 |            |                   |                    |

| Logistic regression (univariate) - M24, N=157                                           |                               |                                                                             |            |                   |                       |
|-----------------------------------------------------------------------------------------|-------------------------------|-----------------------------------------------------------------------------|------------|-------------------|-----------------------|
| Factor                                                                                  | N                             | Maintenance of MTX<br>for the first two years<br>after b/tsDMARD initiation | P type III | OR [95% CI]       | P versus<br>Reference |
| Anti-CCP rate                                                                           | Missing (N=8)                 |                                                                             |            |                   |                       |
|                                                                                         | Positive (N=108)              | 33.3%                                                                       | 0.925      | 0.96 [0.45; 2.06] | 0.925                 |
|                                                                                         | Negative (N=41) (Reference)   | 34.1%                                                                       |            |                   |                       |
| Diagnosis history (years)                                                               | Quantitative analysis (N=157) |                                                                             | 0.398      | 1.02 [0.98; 1.06] |                       |
| Presence of radiologic signs                                                            | Missing (N=1)                 |                                                                             |            |                   |                       |
|                                                                                         | Yes (N=74)                    | 36.5%                                                                       | 0.641      | 1.17 [0.60; 2.27] | 0.641                 |
|                                                                                         | No (N=82) (Reference)         | 32.9%                                                                       |            |                   |                       |
| Number of swollen joints                                                                | Missing (N=3)                 |                                                                             |            |                   |                       |
|                                                                                         | Quantitative analysis (N=154) |                                                                             | 0.642      | 1.02 [0.94; 1.10] |                       |
| Rate of CRP (mg/L)                                                                      | Missing (N=2)                 |                                                                             |            |                   |                       |
|                                                                                         | Quantitative analysis (N=155) |                                                                             | 0.401      | 1.00 [1.00; 1.01] |                       |
| Evaluation of disease activity by the<br>participant (visual analogue scale 100–<br>mm) | Missing (N=7)                 |                                                                             |            |                   |                       |
|                                                                                         | Quantitative analysis (N=150) |                                                                             | 0.117      | 1.01 [1.00; 1.03] |                       |
| Did you participate to a global<br>program of therapeutic re-education?                 | Missing (N=23)                |                                                                             |            |                   |                       |
|                                                                                         | Yes (N=26)                    | 30.8%                                                                       | 0.944      | 0.97 [0.38; 2.44] | 0.944                 |
|                                                                                         | No (N=108) (Reference)        | 31.5%                                                                       |            |                   |                       |

| Logistic regression (univariate) - M24, N=157          |                                                        |                                                                       |            |                   |                    |
|--------------------------------------------------------|--------------------------------------------------------|-----------------------------------------------------------------------|------------|-------------------|--------------------|
| Factor                                                 | N                                                      | Maintenance of MTX for the first two years after b/tsDMARD initiation | P type III | OR [95% CI]       | P versus Reference |
| <b>Factors related to the practitioner</b>             |                                                        |                                                                       |            |                   |                    |
| Type of practice                                       | Hospital-based practice (N=110)                        | 40.9%                                                                 | 0.010      | 2.92 [1.29; 6.64] | 0.010              |
|                                                        | Hospital-based and private practice (N=47) (Reference) | 19.1%                                                                 |            |                   |                    |
| Who send the patient to you?                           | Rheumatologist (N=48) (Reference)                      | 35.4%                                                                 | 0.858      | 0.94 [0.46; 1.91] | 0.858              |
|                                                        | Other (N=109)                                          | 33.9%                                                                 |            |                   |                    |
| Shared medical decision (based on participant opinion) | Missing (N=31)                                         |                                                                       | 0.562      | 1.26 [0.58; 2.71] | 0.562              |
|                                                        | Yes indeed (N=58) (Reference)                          | 27.6%                                                                 |            |                   |                    |
|                                                        | A lot – Not at all (N=68)                              | 32.4%                                                                 |            |                   |                    |
| Age of the practitioner                                | 30–49 years old (N=90)                                 | 34.4%                                                                 | 0.988      | 1.01 [0.52; 1.96] | 0.988              |
|                                                        | 50 years old or more (N=67) (Reference)                | 34.3%                                                                 |            |                   |                    |

Abbreviations: *anti-CCP*, anti-cyclic citrullinated peptide; *b/tsDMARD*, biologic and targeted synthetic disease-modifying antirheumatic drugs; *CI*, confidence interval; *CRP*, c-reactive protein; *CQR19*, Compliance Questionnaire Rheumatology (19-items); *HAQ-DI*, Health Assessment Questionnaire–Disability Index; M24, study visit 24 months after b/tsDMARD initiation; *MTX*, methotrexate; *OR*, odds ratio.

### Supplementary Table S4. Factors in favour of same MTX treatment maintenance

| Explanatory Factor                                                           |             | M24 visit         |
|------------------------------------------------------------------------------|-------------|-------------------|
| Rheumatologist practice:                                                     |             |                   |
| Exclusive hospital-based practice versus                                     | OR [95% CI] | 2.94 [0.98; 8.85] |
| Private practice with partial hospital-based practice <sup>a</sup>           | <i>p</i>    | 0.055             |
| Participant age                                                              | OR [95% CI] | 1.04 [1.01, 1.08] |
|                                                                              | <i>p</i>    | 0.011             |
| Disease activity evaluated by the participant (visual analogue scale 100–mm) | OR [95% CI] | 1.02 [1.00, 1.04] |
|                                                                              | <i>p</i>    | 0.0050            |
| Smoking status:                                                              | OR [95% CI] | 1.95 [0.66; 5.78] |
| Former smoker, or non-smoker versus Current smoker <sup>a</sup>              | <i>p</i>    | 0.231             |

<sup>a</sup> Reference for multivariate analysis.

Note: The following factors were tested in univariate logistic regression and not retained in further analysis: b/tsDMARD monotherapy versus combination therapy; HAQ-DI score; corticosteroids taken at inclusion (yes versus no); treatment observance (CQR19 score); MTX mode of administration before inclusion (self-administered subcutaneous or oral versus injection administered by someone else); obesity (yes versus no); professional activity (yes versus no); comorbidities (yes versus no); rheumatoid factor (positive versus negative); anti-CCP antibodies (positive versus negative); time since diagnosis; presence of radiologic signs (yes versus no); number of swollen joints; CRP levels; shared medical decision-making between participant and practitioner (yes versus no); participation in a global therapeutic program (yes versus no); and the age of the practitioner. The multivariable analysis was adjusted for centre-level clustering effect.

Abbreviations: *anti-CCP*, anti-cyclic citrullinated peptide; *b/tsDMARD*, biologic and targeted synthetic disease-modifying antirheumatic drugs; *CI*, confidence interval; *CRP*, c-reactive protein; *CQR19*, Compliance Questionnaire Rheumatology (19-items); *HAQ-DI*, Health Assessment Questionnaire–Disability Index; M24, study visit 24 months after b/tsDMARD initiation; *MTX*, methotrexate; *OR*, odds ratio.
